# Supplementary material for: Technology-Based Self-Care Methods of Improving Antiretroviral Adherence: A Systematic Review
Source: PLoS One. 2011 Nov 30;6(11):e27533. doi: 10.1371/journal.pone.0027533 (PMC3227571; doi:10.1371/journal.pone.0027533)
Supplement: Table S2 — Summary of quantitative studies with secondary outcomes. (XLSX) [file pone.0027533.s002.xlsx]

## Sheet: Sheet1
Table S2. Summary of quantitative studies with secondary outcomes
Source	Country, City/State	Inclusion / Exclusion Criteria	Study Objectives	If examined interventions, description of intervention	Length of follow-up	Secondary Outcomes
	Start-End Year
	Sample size
	Age (years)
	% Male/BL/WH
Crankshaw et al, 2010 [51]	South Africa, Durban	Inclusion: ≥18years, ambulatory, presented for treatment to the clinic between October-December 2007	Ascertain if contact via patients’ mobile telephones was feasible & acceptable for appointment reminders & adherence messages.	NA	None	- Use of mobile telephone alarm function was a commonly mentioned ARV adherence strategy
	2007-2007					- 79% of participants were utilizing alarm clock feature on mobile telephone and received text messages from treatment supporters
	N = 300
	Median age = 35
	33% / 96% / 0.4%
Dunbar et al, 2003[52]	United states, Washington	Inclusion: Taking ARVs, willing to carry pager, receiving medications from pharmacy in clinic	Assess feasibility of automated two-way messaging system (alphanumeric pager) to improve adherence.	3-8 individualized daily messages: to remind, educate, encourage adherence, & solicit responses on adverse effects & self-reported adherence. Included entertaining message & educational messages (importance of adherence). All messages requested acknowledgement.	6 months	- 19/25 used pager for ≥3 months (2 dropped out due to dislike of pager); 84% replied to messages; 79% reported improved adherence; 47% “loved” pager; 86% expressed desire to continue use
	1997-1998					- Pro: medication reminders & entertaining messages
	N = 25					- Con: size of pager
	Mean age = 39					- Time commitment: 30 minutes/day to review messages; 1 day/month to load messages
	88% / N/R / 64%
Holzemer et al, 2000[53]	United States, California	N/R	Assess feasibility & acceptability of CAP-IT (Client Adherence Profiling-Intervention Tailoring) to enhance ARV adherence.	CAP-IT protocol: diagnosis of adherence problem & selection of intervention based on patient factors, treatment regimen (memory devices: alarm, pillbox, chart, beeper, clock, checklist, day-timer, etc.), & client-provider relationship.	10 days	- Baseline & outcome assessment without difficulty
	N/R					- Short-duration of completing the assessment & initiation of protocol
	N = 10					- No client withdrawal but some fatigue
	Mean age = 42.6					- Client burden did not appear to be a problem
	70% / N/R / N/R					- 80% used at least one type of reminder
Konkle-Parker et al, 2010[54]	United States, Mississippi	Inclusion: Participants whose provider reported that they are starting ARV for 1st time or restarting ARV after at least 6 months of being off	Assess feasibility, acceptability, & perceived value of intervention.	Two 1-on-1 sessions & 6 phone calls. IMB model: information about HIV, ARVs, & adherence; motivated by video of peers about adherence, motivational interviewing; adherence-enhancing devices (pillbox & alarm watch); training in communication skills with provider.	6 months	- Attrition rate =51%
	2005-2006			Control: standard of care		- Of 33 in intervention arm, 55% completed 7-8 of 8 contacts, 18% completed 3-6, 12% completed 1-2, 15% didn't complete any
	N = 56					- Adherence based on refill records most closely associated with clinical indicators; limited use of MEMS
	N/R					- Participants uniformly positive about study
	63% / 89% / N/R					- Most found video helpful
						- Many stated that they used one reminder device
Powell-Cope et al, 2003[55]	United States, Florida	Inclusion: substance using women taking ARVs, not currently using reminder devices on a consistent basis	Assess feasibility, acceptability & effect of reminder devices: a little reminder (ALR; small timer buzzing at preset times); pager (beep or vibrate at pre-specified times); Westclox pillbox (pillbox with timer).	Randomly assigned to one of 3 adherence devices, instructed on their use, told to report any problems to RN case manager, receive monthly visits from RN.	2 months	- 1 changed from pager
	2000-2000					- No device lost or malfunctioned
	N = 24					- All reported using device; most satisfied with ALR (small size)
	Median age = 36					- Reported that organizational aids made it easier to adhere
	0% / 88% / 12%					- Self-reported adherence: 33% missed ≥1 dose in past 2 weeks; at 1 month 30%, at 2 months 30%
						- At 1 month: fewer women missed doses than baseline due to sleeping through dose (p<0.01) or being busy (p<0.05); feeling good & change in schedule also less common (p=0.07)
Smith et al, 2005[56]	United States, North Carolina	Inclusion: ≥18years, English-speaking, initiating or modifying ARV at time of initial visit	Assess feasibility & acceptability of PDAs to display a video animation describing optimal ways to take ARVs & importance of ARV adherence.	Participants viewed 17-minute video on ARVs & adherence narrated by multidisciplinary group of clinicians who were staff at HIV clinic. Then, patients completed questionnaire to assess video quality, understanding of topics, knowledge of HIV & ARVs, etc.	None	- PDA well-accepted tool to assist in counseling about ARVs
	N/R					- Low literacy patients prefer health info in form of video over written info & find info easier to remember over high literacy group
	N = 17					- All agreed that video was helpful in teaching them about their drugs
	Mean age = 42.8
	53% / 82% / 18%
Wong et al, 2006[57]	South Africa, Soweto	Inclusion: 18-50 years, command of English to understand video	Assess feasibility & acceptability of a culturally-sensitive educational video to increase knowledge of ARV resistance & adherence skills.	Administer pre-video questionnaire, show video, then administer post-video questionnaire. Questionnaire assessed patient’s knowledge of medication-taking strategies, basic knowledge of HIV science, management of adverse effects, concept of resistance & adherence.	None	- 34 patients gained 2.3 knowledge points
	2002-2003	Exclusion: unwillingness to watch video, dementia, inability to comprehend English, Zulu, or Sesotho				- 82.3% showed improvement after watching videotape
	N = 34					- ARV-naïve patients had an average improvement of 3.0 points
	Mean age = 31.2					- ARV-experienced patients had an average improvement of 1.9 points
	18% / N/R / N/R					- All 34 indicated that video was clear & engaging
						- Most described changes they want to make to their med-taking strategies (such as disclosure)
Wu et al, 2006 [58]	See Andrade et al [35]in Table 1
